# Supplementary material
Source: bioRxiv or medRxiv preprint supplement (https://www.medrxiv.org/highwire/filestream/94436/field_highwire_adjunct_files/3/2020.08.24.20179085-4.pdf)

Figure\_S4

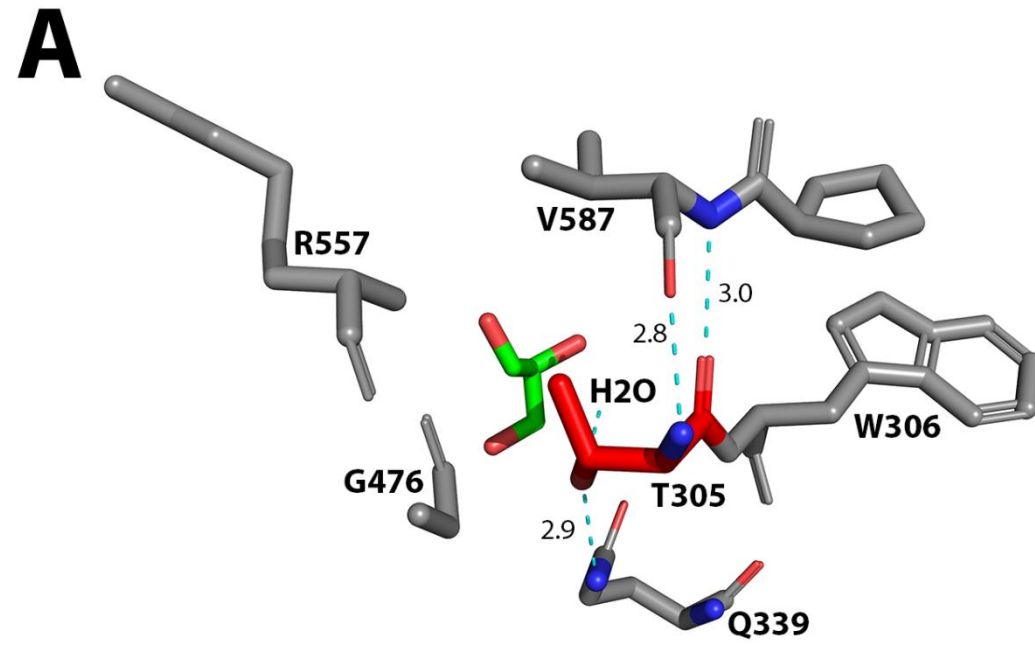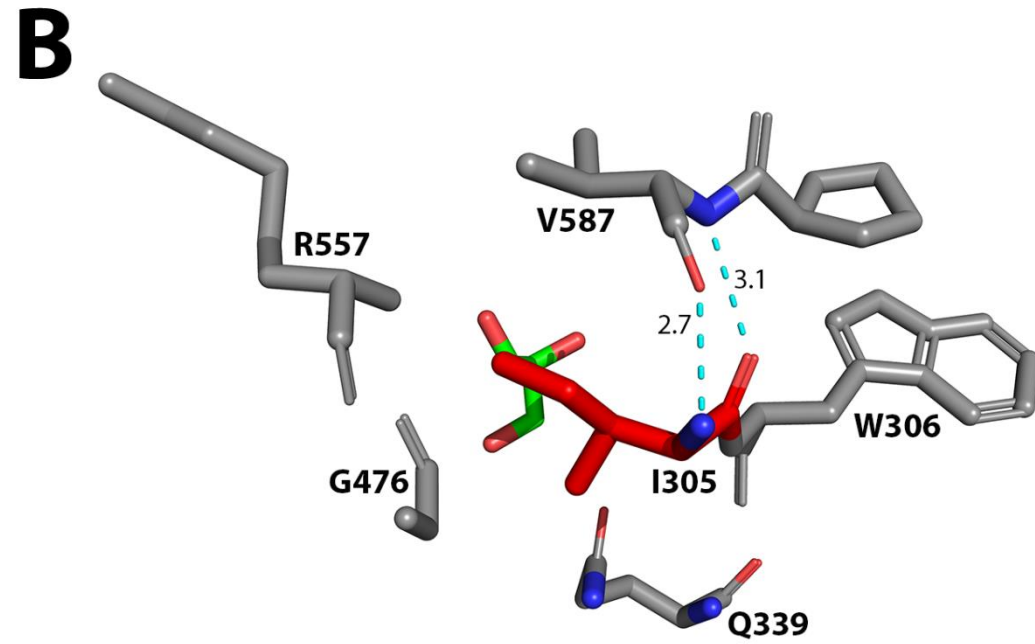

Supplement: Supplementary file [file 2020.08.24.20179085-4.pdf]
